# Supplementary material for: Apple juice relieves loperamide-induced constipation in rats by downregulating the intestinal apical sodium-dependent bile acid transporter ASBT
Source: Royal Society of Chemistry journal article supplement (doi:10.1039/d3fo00510k), 2023-01-01
Supplement: d3fo00510k1.pdf [file d3fo00510k1.pdf]

## Supplementary Materials

### **Apple juice relieves loperamide-induced constipation in rats by downregulating intestinal apical sodium-dependent bile acid transporter ASBT**

Qiunan Zhu <sup>a</sup>, Yusuke Iwai <sup>a</sup>, Takehiro Okaguchi <sup>a</sup>, Yoshiyuki Shirasaka <sup>a</sup>, Ikumi Tamai<sup>\*a</sup>

a: Department of Membrane Transport and Biopharmaceutics, Faculty of Pharmaceutical Sciences, Institute of Medical, Pharmaceutical and Health Sciences, Kanazawa University, Japan

\*: Corresponding author: Ikumi Tamai, Ph.D.

Department of Membrane Transport and Biopharmaceutics, Faculty of Pharmaceutical Sciences, Institute of Medical, Pharmaceutical and Health Sciences, Kanazawa University, Kakuma-machi, Kanazawa 920-1192, Japan

Tel: +81-76-234-4479; Fax: +81-76-264-6284; Email: tamai@p.kanazawa-u.ac.jp

**Supplemental Table 1 Concentration of components in apple juice**

| Component                    | Concentration ( $\mu\text{M}$ )         |
|------------------------------|-----------------------------------------|
| Chlorogenic acid             | 153.00 <sup>a</sup>                     |
| (-)-Epicatechin              | 126.00 <sup>a</sup>                     |
| Procyanidin B2               | 73.00 <sup>a</sup>                      |
| Catechin                     | 24.00 <sup>a</sup>                      |
| Phloridzin                   | 19.00 <sup>a</sup> ; 16.80 <sup>b</sup> |
| Caffeic acid                 | 14.00 <sup>a</sup>                      |
| Phloretin-2'-O-xyloglucoside | 13.00 <sup>a</sup>                      |
| Procyanidin B1               | 7.00 <sup>a</sup>                       |
| Hesperetin                   | 1.39 <sup>b</sup>                       |
| Quercetin                    | 0.46 <sup>b</sup>                       |
| Hesperidin                   | 0.25 <sup>b</sup>                       |
| Phloretin                    | 0.23 <sup>b</sup>                       |
| Kaempferol                   | 0.03 <sup>b</sup>                       |
| Bergamottin                  | 0.02 <sup>b</sup>                       |

a: concentrations from reported study<sup>36</sup>.

b: concentrations from our previous study<sup>37</sup>.

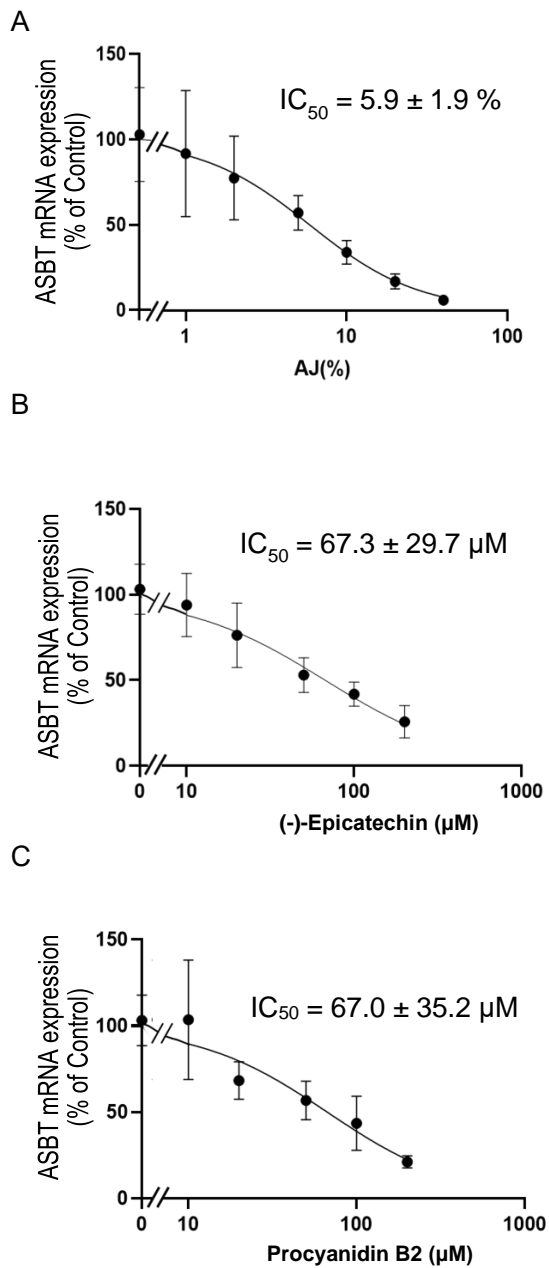

**Supplemental Figure 1.** Inhibitory effects of apple juice, (-)-epicatechin and procyanidin B2 on ASBT mRNA expression in Caco-2 cells.

ASBT mRNA expression level was measured after 48-h exposure of designed concentrations of apple juice (A), (-)-epicatechin (B) and procyanidin B2 (C) in 21-d cultured Caco-2 cells. HPRT was used as a housekeeping gene. The inhibitory effect on ASBT mRNA expression is shown as percentage of control, and the inhibitor concentration giving half-maximum inhibition ( $IC_{50}$ ) was obtained by fitting to the following equation:  $\% \text{ of control} = 100 \times IC_{50} / (IC_{50} + [I])$ , where  $[I]$  is inhibitor concentration ( $\mu\text{M}$ ). Each result represents the mean  $\pm$  S.E.M. ( $n=4$ ).
